# Supplementary material for: Tantalum(v) complexes of an amine triphenolate ligand: a dramatic difference in reactivity between the two labile positionsElectronic supplementary information (ESI) available: synthetic and spectroscopic data for all complexes. See http://www.rsc.org/suppdata/dt/b2/b206759e/
Source: Royal Society of Chemistry journal article supplement (doi:10.1039/b206759e), 2002-08-13
Supplement: b206759e.doc [file b206759e.doc]

Synthetic and spectroscopic data

General

All experiments were performed under an atmosphere of dry nitrogen in a nitrogen-filled glovebox. Ether was purified by reflux and distillation under dry argon atmosphere from Na/benzophenone. Pentane was washed with HNO3/H2SO4 prior to distillation from Na/benzophenone/tetraglyme. NMR data were recorded on a Bruker AC-200 spectrometer and referenced to protio impurities in benzene-d6 ( 7.15). The X-ray diffraction measurements were performed on a Nonius Kappa CCD diffractometer system, using MoK (=0.7107 Å radiation). The analyzed crystals were embedded within a drop of viscous oil and freeze-cooled to ca. 110 K. The structures were solved by a combination of direct methods and Fourier techniques using the SIR-92 software, and were refined by full-matrix least squares with SHELXL-97. The crystals contain partly disordered solvent which affects to some extent the precision of the structure determination.

Synthesis of **1a**

LigH3 (99 mg, 0.23 mmol) was dissolved in diethyl ether and added dropwise to a stirred solution of Ta(OEt)5 (95 mg, 0.23 mmol) in diethyl ether, and the resulting colorless solution was stirred at room temperature. After 3 hours the volatiles were removed under reduced pressure to afford white solid (160 mg, 100% yield). 1H NMR (C6D6, 200MHz)  6.81 (bs, 2H), 6.74 (bs, 1H), 6.56 (bs, 2H), 6.24 (bs, 1H), 4.96 (q, *J*=7 Hz, 2H, O-C*H*2), 4.01 d, *J*=13 Hz, 2H, N-C*H*2), 3.98 (q, *J*=7 Hz, 2H, O-C*H*2), 3.46 (s, 2H, N-C*H*2), 3.19 (d, *J*=13 Hz, 2H, N-C*H*2), 2.40 (s, 3H, Ar-C*H*3), 2.30 (s, 6H, Ar-C*H*3), 2.21 (s, 6H, Ar-C*H*3), 2.11 (s, 3H, Ar-C*H*3), 1.51 (t, *J*=7 Hz, C*H*3), 0.91 (t, *J*=7 Hz, C*H*3). 13C NMR (C6D6, 50.45 MHz)  155.89 (*C*-O), 155.52 (*C*-O), 131.70 (*C*H), 131.09 (*C*H), 127.91 (*C*H), 127.61 (*C*H), 126.67, 125.97, 124.85, 123.74, 70.68 (O-*C*H2), 66.67 (O-*C*H2), 63.15 (N-*C*H2), 60.49 (N-*C*H2), 20.70 (Ar-*C*H3), 20.61 (Ar-*C*H3), 18.99 (O-CH2*C*H3), 18.91 (O-CH2*C*H3), 16.72 (Ar-*C*H3), 16.39 (Ar-*C*H3).

Synthesis of **1b**

Me3SiCl (0.5 mL, 0.5 mmol, 1.0 M in CH2Cl2) was added in one portion to a stirred solution of **1a** in dichloromethane. The colorless solution slowly turned yellow. After two days the solvent was removed in vacuo to provide **1a** as ayellow solid (150 mg, ca. 100% yield). 1H NMR (C6D6, 200MHz)  6.74 (bs, 2H), 6.59 (bs, 1H), 6.49 (bs, 2H), 6.02 (bs, 1H), 4.87 (q, *J*=7 Hz, 2H, O-C*H*2), 4.72 (d, *J*=13 Hz, 2H, N-C*H*2), 3.31 (s, 2H, N-C*H*2), 3.01 (d, *J*=13 Hz, 2H, N-C*H*2), 2.28 (s, 3H, Ar-C*H*3), 2.23 (s, 6H, Ar-C*H*3), 2.18 (s, 6H, Ar-C*H*3), 1.97 (s, 3H, Ar-C*H*3), 1.43 (t, *J*=7 Hz, C*H*3). ). 13C NMR (C6D6, 50.45 MHz)  154.89 (*C*-O), 154.50 (*C*-O), 131.78 (*C*H), 130.95 (*C*H), 130.10, 129.44, 127.88 (*C*H), 127.74 (*C*H), 126.71, 125.39, 125.17, 124.79, 73.57 (O-*C*H2),­­ 64.10 (N-*C*H2), 60.10 (N-*C*H2), 20.68 (Ar-*C*H3), 20.41 (Ar-*C*H3), 17.98 (O-CH2*C*H3), 16.26 (Ar-*C*H3), 16.15 (Ar-*C*H3).

Synthesis of **2a**

LigH3 (62 mg, 0.15 mmol) was dissolved in diethyl ether and added dropwise to a stirred pale yellow solution of Ta(NMe2)5 (60 mg, 0.15 mmol) in diethyl ether. After two hours the solvent was evaporated in vacuo to yield **2a** as an orange solid (106 mg, 0.15 mmol, 100%). 1H NMR (C6D6, 200MHz)  6.78 (m, 2H), 6.57 (m, 3H), 5.96 (d, *J*=2 Hz, 1H), 4.01 (d, *J=*13 Hz, 2H, N-C*H*2), 3.90 (s, 6H, N(C*H*3)2), 3.39 (s, 6H, N(C*H*3)2), 3.20 (s, 2H, N-C*H*2), 2.87 (d, *J=*13 Hz, 2H, N-C*H*2), 2.33 (s, 3H, Ar-C*H*3), 2.30 (s, 6H, Ar-C*H*3), 2.21(s, 6H, Ar-C*H*3), 2.02 (s, 3H, Ar-C*H*3). 13C NMR (C6D6, 50.45 MHz)  157.06 (*C*-O), 154.91 (*C*-O), 131.79 (*C*H), 130.36 (*C*H), 128.33 (*C*H), 128.04 (*C*H), 126.54, 126.30, 125.50, 125.06, 124.29, 64.99 (N-*C*H2), 59.63 (N-*C*H2), 47.88 (N(*C*H3)2), 46.84 (N(*C*H3)2), 20.72 (Ar-*C*H3), 20.62 (Ar-*C*H3), 17.32 (Ar-*C*H3), 16.23 (Ar-*C*H3).

Synthesis of **2b**

Me3SiCl (0.3 mL, 0.3 mmol, 1.0 M in CH2Cl2) was added to a stirred solution of **2a** in dichloromethane. After two days the solvent was evaporated to afford **2a** in quantitative yieldas ayellow solid **(**150 mg, 0.15 mmol). 1H NMR (C6D6, 200MHz)  6.74 (s, 2H), 6.62 (s, 1H), 6.49 (s, 2H), 6.01(s, 1H), 4.77 (d, *J*=13 Hz, 2H, N-C*H*2), 4.08 (s, 6H, N(C*H*3)2), 3.24 (s, 2H, N-C*H*2), 2.92 (d, *J*=13 Hz, 2H, N-C*H*2), 2.28 (s, 3H, Ar-C*H*3), 2.17 (bs, 12H, Ar-C*H*3), 1.97 (s, 3H, Ar-C*H*3). 13C NMR (C6D6, 50.45 MHz)  155.24 (*C*-O), 154.51 (*C*-O), 131.60 (*C*H), 130.80 (*C*H), 130.23, 128.35, 128.18, 127.52 (*C*H), 127.41 (*C*H), 126.00, 125.35, 125.21, 63.53 (N-*C*H2), 59.47 (N-*C*H2), 46.47 (N(*C*H3)2), 20.66 (Ar-*C*H3), 20.41 (Ar-*C*H3), 16.69 (Ar-*C*H3), 16.43 (Ar-*C*H3).

Synthesis of **2c**

To a stirred solution of **2b** (61 mg, 0.09 mmol) in dichloromethane, Me3SiCl (0.9 mmol, 0.9 mL, 1.0 M in dichloromethane) was added. The resulting yellow solution was stirred at room temperature. After 3 days the solvent was removed in vacuo. 1H NMR indicated that the resulting yellow-orange solid consists of two products: **2b** and **2c**. The mixture was separated by pentane wash, as **2c** has poor solubility in non-coordinating solvents. The final yield was 16 mg (0.024 mmol, 27%). 1H NMR (C6D6, 200MHz)  6.66 (bs, 2H), 6.49 (bs, 1H), 6.43 (bs, 2H), 5.93 (bs, 1H), 4.48 (d, *J*=14 Hz, 2H, N-C*H*2), 3.17 (s, 2H), 2.95 (d, *J*=14 Hz, 2H, N-C*H*2), 2.26 (s, 3H, Ar-C*H*3), 2.19 (s, 6H, Ar-C*H*3), 2.14 (s, 6H, Ar-C*H*3), 1.90 (s, 3H, Ar-C*H*3). 13C NMR (C6D6, 50.45 MHz)  154.31 (*C*-O), 153.70 (*C*-O), 132.05, 131.36, 131.26, 130.75, 128.31, 127.25, 126.96, 125.34, 124.07, 123.94, 64.19 (N-*C*H2), 60.07 (N-*C*H2), 20.58 (Ar-*C*H3), 20.28 (Ar-*C*H3), 15.93 (Ar-*C*H3), 15.62 (Ar-*C*H3).
